# Supplementary material
Source: publisher figshare collection journal article supplement (https://acs.figshare.com/ndownloader/files/3608079)
Supplement: Supplementary file 1 [file 3608079]

## Crystallization of a Bicontinuous Cubic Phase of a Lipid

Toshihiko Oka<sup>\*,†,§</sup>, and Hiroki Hojo<sup>‡</sup>

<sup>†</sup>Department of Physics, Graduate School of Science, <sup>§</sup>Nanomaterials Research Division, Research Institute of Electronics, and <sup>‡</sup>Department of Physics, Faculty of Science, Shizuoka University, Shizuoka 422-8529, Japan

\*Corresponding author: [stoka@ipc.shizuoka.ac.jp](mailto:stoka@ipc.shizuoka.ac.jp)

### Supporting Information

Figure S1: A circular averaged profile of Figure 2a. Indexing of the peaks indicates the phase of this region is the  $Q_{II}^D$ .

Figure S2: Sequential X-ray diffraction patterns of the MO sample after one week soaking in water without oscillation.

Figure S3: Sequential X-ray diffraction patterns of the MO sample at the 22 mm with the oscillation angle of the  $10^\circ$

Table S1: Averaged intensities of diffraction spots.

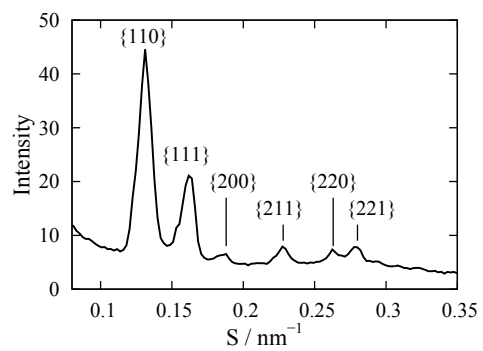

Figure S1: A circular averaged profile of Figure 2a. Indexing of the peaks indicates the phase of this region is the  $Q_{II}^D$ .

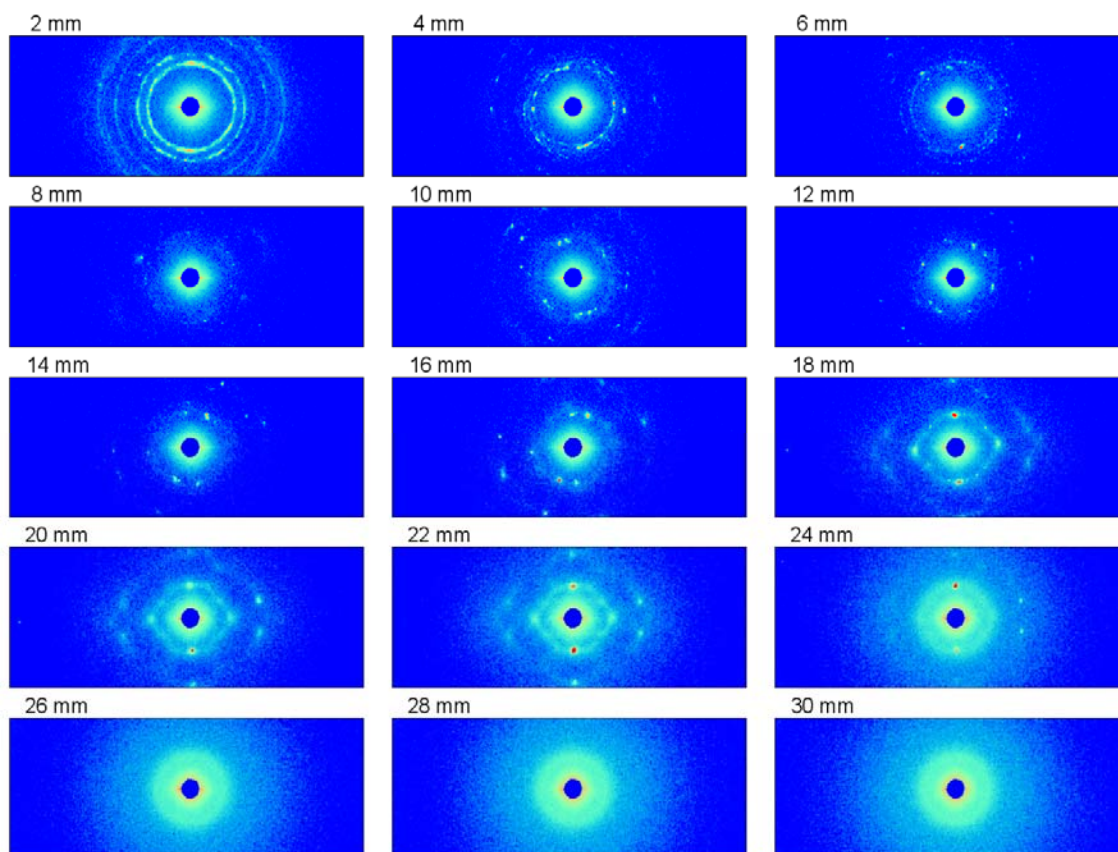

Figure S2. Sequential X-ray diffraction patterns of the MO sample after one week soaking in water without oscillation. Distances from the edge facing the bulk water are also shown.

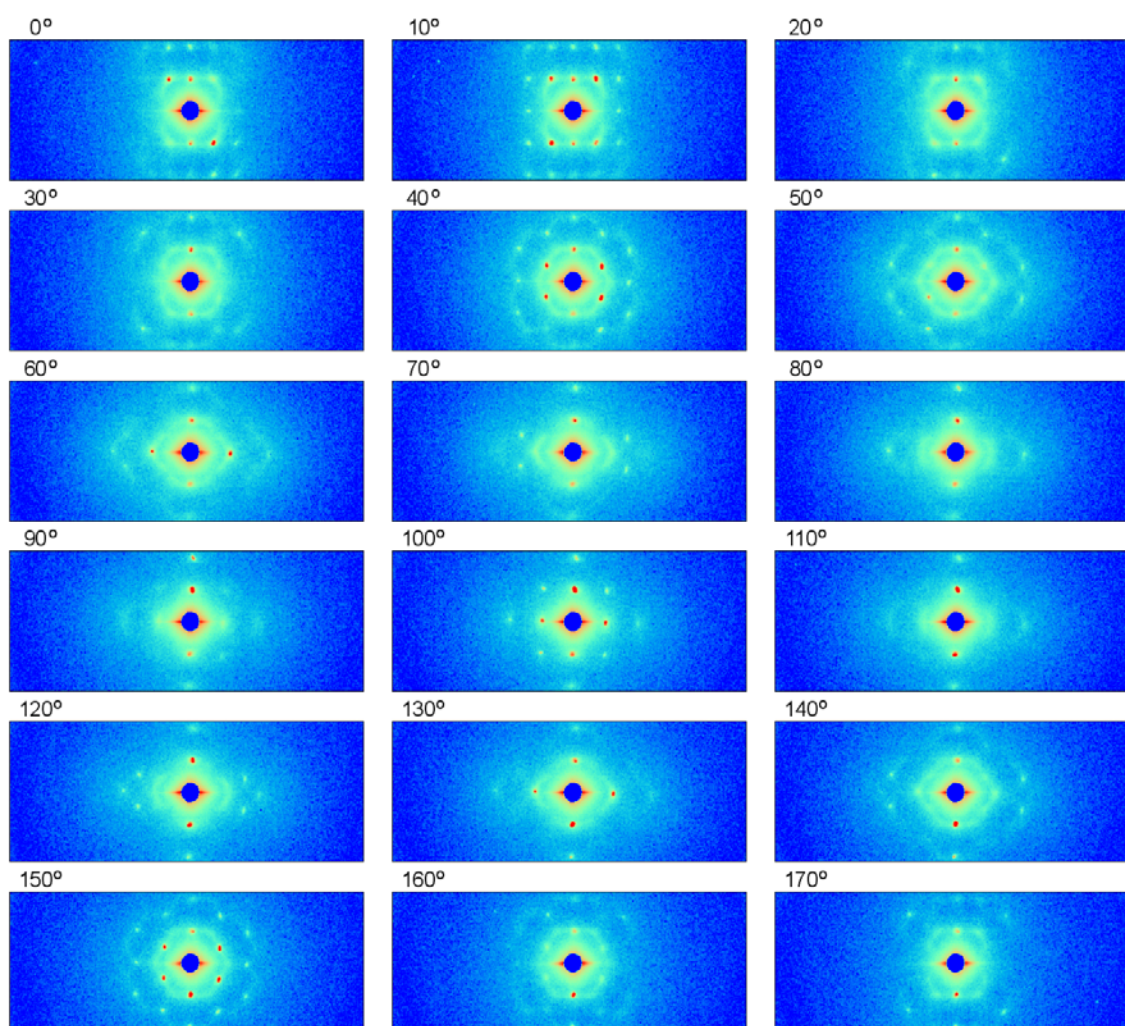

Figure S3. Sequential X-ray diffraction patterns of the MO sample at the 22 mm with the oscillation angle of the 10°. Rotation angles are also shown. Diffraction patterns change angle dependently.

| Miller index  | Intensity      |
|---------------|----------------|
| $\{1\ 1\ 0\}$ | $8945 \pm 139$ |
| $\{1\ 1\ 1\}$ | $8924 \pm 467$ |
| $\{2\ 0\ 0\}$ | $627 \pm 187$  |
| $\{2\ 1\ 1\}$ | $674 \pm 46$   |
| $\{2\ 2\ 0\}$ | $425 \pm 85$   |
| $\{2\ 2\ 1\}$ | $459 \pm 53$   |
| $\{2\ 2\ 2\}$ | $255 \pm 265$  |

Table 1. Averaged intensities of diffraction spots.
